# Supplementary material for: Pulsed laser writing of holographic nanosensors
Source: Royal Society of Chemistry journal article supplement (doi:10.1039/c3tc32507e), 2014-01-01
Supplement: c3tc32507e1.pdf [file c3tc32507e1.pdf]

## **Pulsed laser writing of holographic nanosensors**

A. K. Yetisen,<sup>†a\*</sup> M. M. Qasim,<sup>†b\*</sup> S. Nosheen,<sup>b</sup> T. D. Wilkinson,<sup>b</sup> and C. R. Lowe<sup>a</sup>

<sup>a</sup> Department of Chemical Engineering and Biotechnology, University of Cambridge, Tennis Court Road, Cambridge, CB2 1QT, UK

<sup>b</sup> Centre of Molecular Materials for Photonics and Electronics, Department of Engineering, University of Cambridge, 9 JJ Thomson Avenue, Cambridge, CB3 0FA, UK

\* Corresponding authors: [gmm20@cam.ac.uk](mailto:gmm20@cam.ac.uk) and [ay283@cam.ac.uk](mailto:ay283@cam.ac.uk)

<sup>†</sup> Equal contribution

## Preparation of the Recording Medium

Composition: HEMA (99.5 mol%), TACPP porphyrin (0.5 mol%) and DMPA hydrogel.

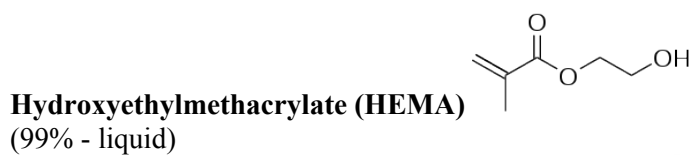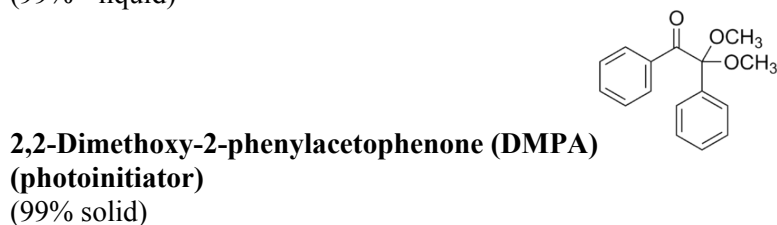

**Porphyrin (TACPP 2)** (in DCM, 80 mg/mL)

The initial solvent was DCM, and it was evaporated and replaced by THF.

Total volume needed to make a full microscope slide of hydrogel: 200  $\mu$ L

**Table.** Composition of the polymer

| Material | MW (g/mol) | Molarity (mol) | Molarity (%) |
|----------|------------|----------------|--------------|
| HEMA     | 130.14     | 0.00995        | 99.5         |
| TACPP    | 1495.62    | 0.00005        | 0.5          |
| DMPA     | 256.30     |                |              |

In total, 0.0005 mol of monomer mixture was prepared.

### Required weight

0.0004975 moles of HEMA,  $M \cdot m_w = \text{mass}$ ; therefore  $0.0004975 \text{ [mol]} \times 130.14 \text{ [g/mol]} = 0.06474465 \text{ g}$

0.0000025 moles of TACPP,  $M \cdot m_w = \text{mass}$ ; therefore  $0.0000025 \text{ [mol]} \times 1495.62 \text{ [g/mol]} = 0.00373905 \text{ g}$

### Required volume

$V = m / \rho$ , therefore for HEMA,  $V = 0.06474465 \text{ [g]} / 1.07 \text{ [g/ml]} = 60.51 \text{ } \mu\text{L}$

$V = m / \rho$ , therefore for TACPP,  $V = 0.00373905 \text{ [g]} / 0.08 \text{ [g/ml]} = 46.74 \text{ } \mu\text{L}$

**Photoinitiator:** DMPA (0.001 g)

Total volume:  $\sim 107 \text{ } \mu\text{L}$

## Porphyrin-based Holographic Sensor and its Bragg diffraction

The fabricated sensor showed visible-light Bragg diffraction (Figure S1).

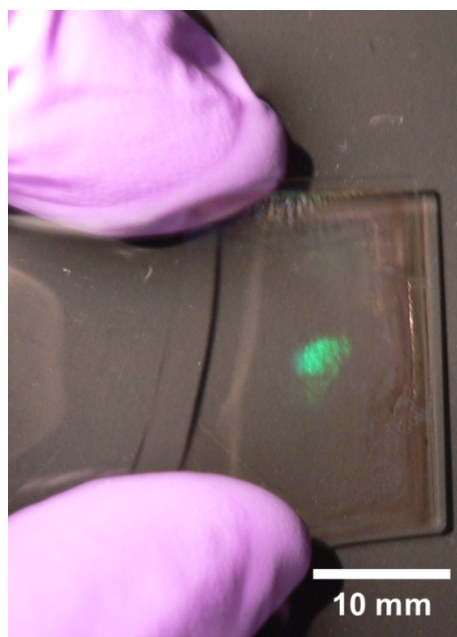

**Figure S1.** Tunable holographic sensor

## Characterisation of the Porphyrin

UV-Vis measurements were taken to characterise the compound (Figure S2a) and polymer matrix before and after laser exposure (Figure S2b).

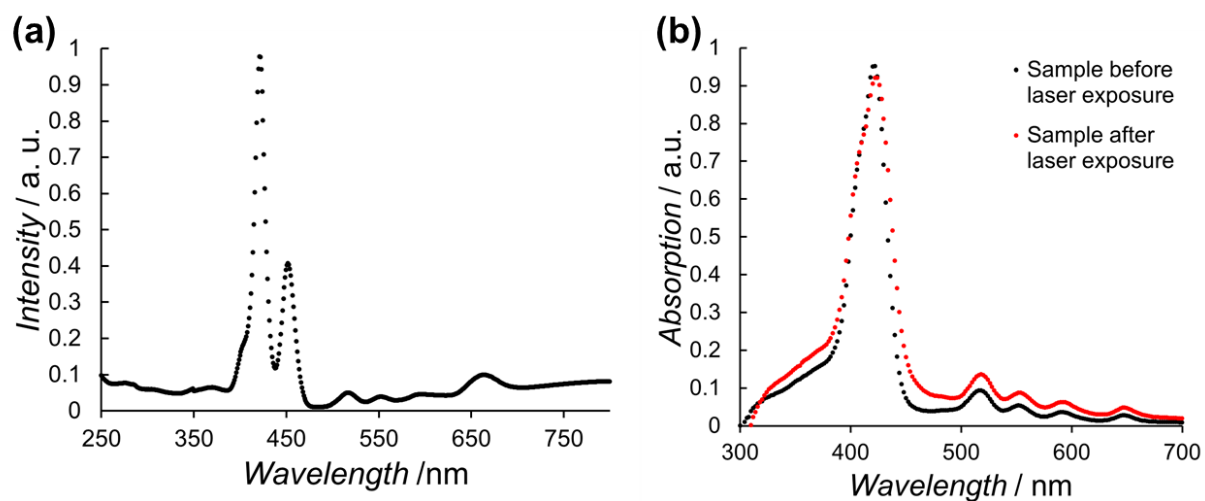

**Figure S2.** Ultraviolet-visible spectroscopy of (a) TACPP 2 in solution showing peaks at 422 nm (soret band) and 453 nm, (b) sample before and after laser-light exposure.

### The system's response to pure organic solvents

Wavelength shifts were recorded at -38, -24 and 37 nm deviated from ~320 nm for pure dichloromethane, chloroform and tetrahydrofuran, respectively (Figure S3).

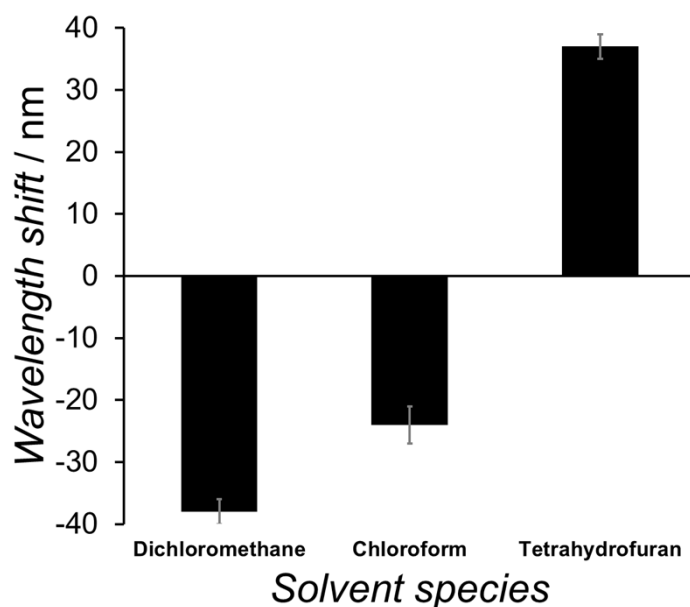

**Figure S3.** The response of the sensor to various organic solvents.

### The influence of pH change on the absorption characteristics of the hologram

Upon changing the pH of the pHEMA-TACPP system from 7.0 to 3.0, the absorption showed a shift from 420 nm (pH 7.0) to 425 nm (pH 3.0) (Figure S4).

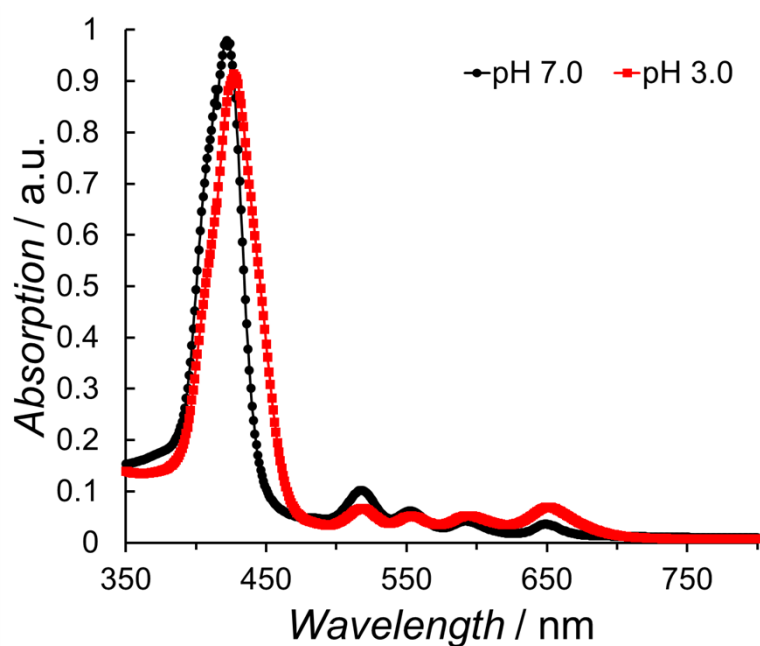

**Figure S4.** Ultraviolet-visible spectroscopy of pHEMA-TACPP system

### The influence of low ionic strength on the sensor response

Different ionic strengths at low concentrations were tested with the fabricated sensor. Figure S5 shows the diffraction measurements.

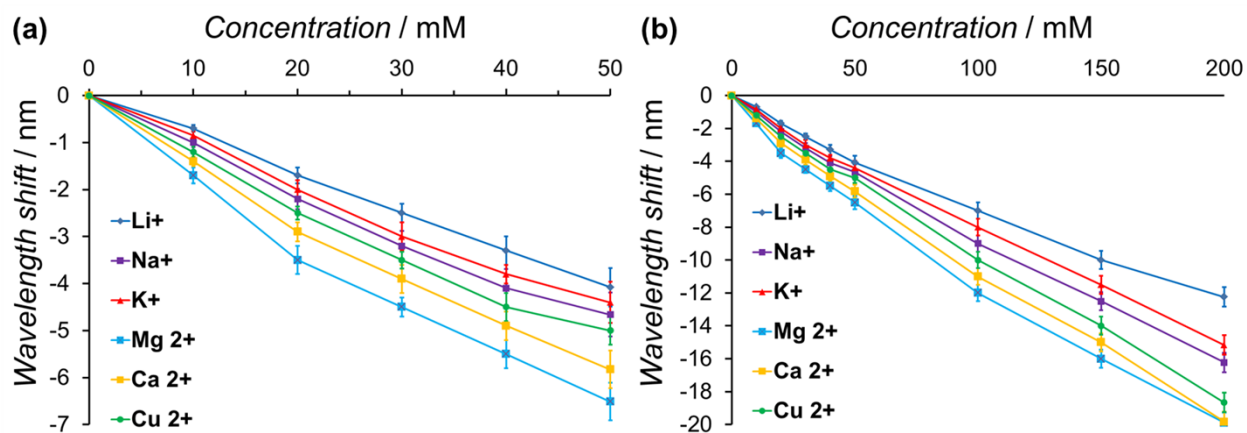

**Figure S5.** The effect of ionic strength on the sensor response (Donnan osmotic pressure (dominant) and the chelation effect)

### The influence of high ionic strength on the sensor response

High concentrations of ionic strength cause the polymer to shrink due to the Donnan osmotic pressure (Figure S6).

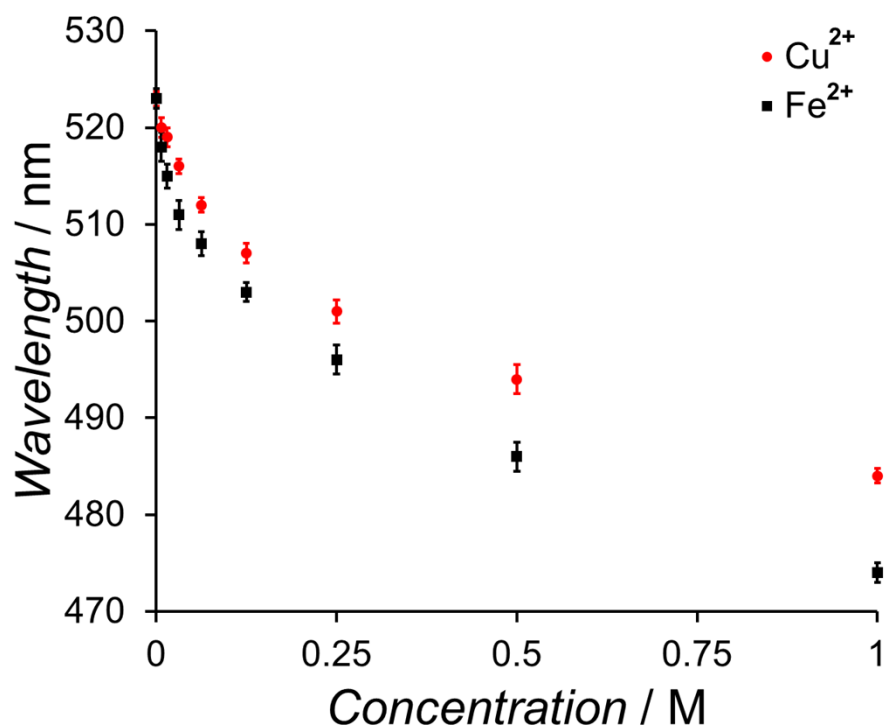

**Figure S6.** Shrinkage in the system due to the Donnan osmotic pressure.
